# Supplementary material for: Photo-induced valence tautomerism and polarization switching in mononuclear cobalt complexes with an enantiopure chiral ligand
Source: Royal Society of Chemistry journal article supplement (doi:10.1039/d3dt03915c), 2024-01-01
Supplement: d3dt03915c1.pdf [file d3dt03915c1.pdf]

## Supplementary Information for

# Photo-induced Valence Tautomerism and Polarization Switching in Mononuclear Cobalt Complexes with an Enantiopure Chiral Ligand

Wen-Huang Xu <sup>a</sup>, Yu-Bo Huang <sup>a</sup>, Wen-Wei Zheng <sup>a</sup>, Sheng-Qun Su <sup>a</sup>, Shinji Kanegawa <sup>a</sup>, Shu-Qi Wu <sup>a\*</sup>, and Osamu Sato <sup>a\*</sup>

<sup>†</sup>Institute for Materials Chemistry and Engineering and IRCCS, Kyushu University, 744 Motooka, Nishi-ku, Fukuoka, 819-0395, Japan

## Synthesis and Methods

### Materials

(7*S*,14*S*)-5,5,7,12,12,14-hexamethyl-1,4,8,11-tetraazacyclotetradecane (*SS*-cth) was synthesized according to previously reported procedures<sup>1</sup>.

[Co(*SS*-cth)(Phendiox)]PF<sub>6</sub>·0.5EtOH & [Co(*SS*-cth)(Phendiox)]AsF<sub>6</sub>·0.5EtOH

An equimolar amount of *SS*-cth (1.7 g) was added into an MeOH (10 mL) solution containing Co(OAc)<sub>2</sub>·2H<sub>2</sub>O (1.5 g), and the mixture was stirred at 70°C for 5 min. An equimolar amount of NaPF<sub>6</sub> and NaAsF<sub>6</sub> was then added into the solution, which was further stirred at 70°C for 5 min. After cooling down to room temperature, the precipitated solid was filtered from the solution and washed with Et<sub>2</sub>O. The obtained plum red powder, Co(AcO)(*SS*-cth)AsF<sub>6</sub> and Co(AcO)(*SS*-cth)AsF<sub>6</sub>, was dried under reduced pressure and stored at -5°C.

9,10-Phenanthrene-1,10-dione (108 mg) and 9,10-phenanthrene-9,10-diol (110 mg) were added in a molar ratio of 1:1 in EtOH (15 mL), with flowing N<sub>2</sub> gas. After that, NaOH (40 mg) was added into the solution, which was stirred until it became dark red. Co(OAc)(*SS*-cth)AsF<sub>6</sub> and Co(OAc)(*SS*-cth)AsF<sub>6</sub> was poured into the solution immediately and stirred at 70°C until a precipitate started to form. After the solution was cooled down in an ice bath, the desired compound was obtained as a dark brown microcrystalline product.

Recrystallization was performed by dissolving the product in a 1:1 EtOH/H<sub>2</sub>O solvent mixture, followed by evaporation in flowing N<sub>2</sub> for 2 days. Tiny flake-like crystals were obtained.

### Methods

### Magnetic measurements

Magnetic susceptibility measurements were performed on a Quantum Design MPMS-XL

superconducting quantum interference device magnetometer under a 2000 Oe field with a sweeping rate of 5 K min<sup>-1</sup>. The samples for measurement were prepared by encapsulating the samples into a gelatin capsule. To prevent loss of co-crystallized ethanol molecules, the measurements of the pristine samples were performed from 300 to 5 K, followed by heating up to 400 K. The samples were then maintained at 400 K for an adequate duration of time, and another complete measurement cycle between 400 and 5 K were conducted to determine the magnetic properties of the desolvated samples. The sample for light-induced magnetic susceptibility measurements were performed by attaching a powdered sample to transparent tape. A GLMP-0200A green laser (532 nm) was used as the excitation source, and the samples were irradiated at 5 K for over 40 min.

### **X-ray diffraction measurements and crystal structural determination**

The X-ray crystal structure of [Co(SS-cth)(Phendiox)]PF<sub>6</sub>·0.5EtOH was obtained at 78 and 300 K under a cold nitrogen gas stream using a Rigaku Mercury2 CCD detector at BL02B1/Spring-8 (Hyogo, Japan). The wavelength of the incident X-ray was 0.4171 Å. The crystal structures were solved and refined using the OLEX2 program with anisotropic thermal parameters for all nonhydrogen atoms<sup>2</sup>. The hydrogen atoms were geometrically added and refined by the riding model.

### **Temperature-dependent IR and UV spectrum**

Temperature-dependent IR spectra were recorded on an FTIR spectrophotometer (FT/IR-660 Plus, Jasco) equipped with a liquid nitrogen refrigerator cryostat (LT-3-110, Advanced Research System, Ins). The powdered samples were held on a plane CaF<sub>2</sub> plate. The measurements were performed by heating up the sample cabin gradually using a programming temperature controller (331, LakeShore) after cooling down the system to 100 K. Temperature-dependent UV absorption spectra were recorded using a UV-3100PC (Shimadzu) spectrophotometer with a liquid nitrogen refrigerator cryostat (LT-3-110, Advanced Research System, Inc.). The powdered samples were speared evenly on a transparent tape.

### **Thermogravimetric analysis**

Thermogravimetric analysis was performed on a DTU-2A equipment at 293–523 K with a heating rate of 10 K min<sup>-1</sup> under air atmosphere. Samples of 10.3 mg of ground powder were prepared to monitor the weight loss during the whole temperature range.

### **Polarization switching calculation**

The polarization switching value is calculated using following function:

$$\Delta P = \frac{2\{\mu_{\alpha(LT)}\cos(\theta_{\alpha(LT)}) + \mu_{\beta(LT)}\cos(\theta_{\beta(LT)})\} - [\mu_{\alpha(HT)}\cos(\theta_{\alpha(HT)}) + \mu_{\beta(HT)}\cos(\theta_{\beta(HT)})]}{V_{cell}}$$

$\mu_i$  indicate the dipole moments of each motif in different temperature, and  $\theta_i$  indicate the angle between each motif and polar *b*-axis of the lattice.  $V_{cell}$  refers to the volume of the unit cell.

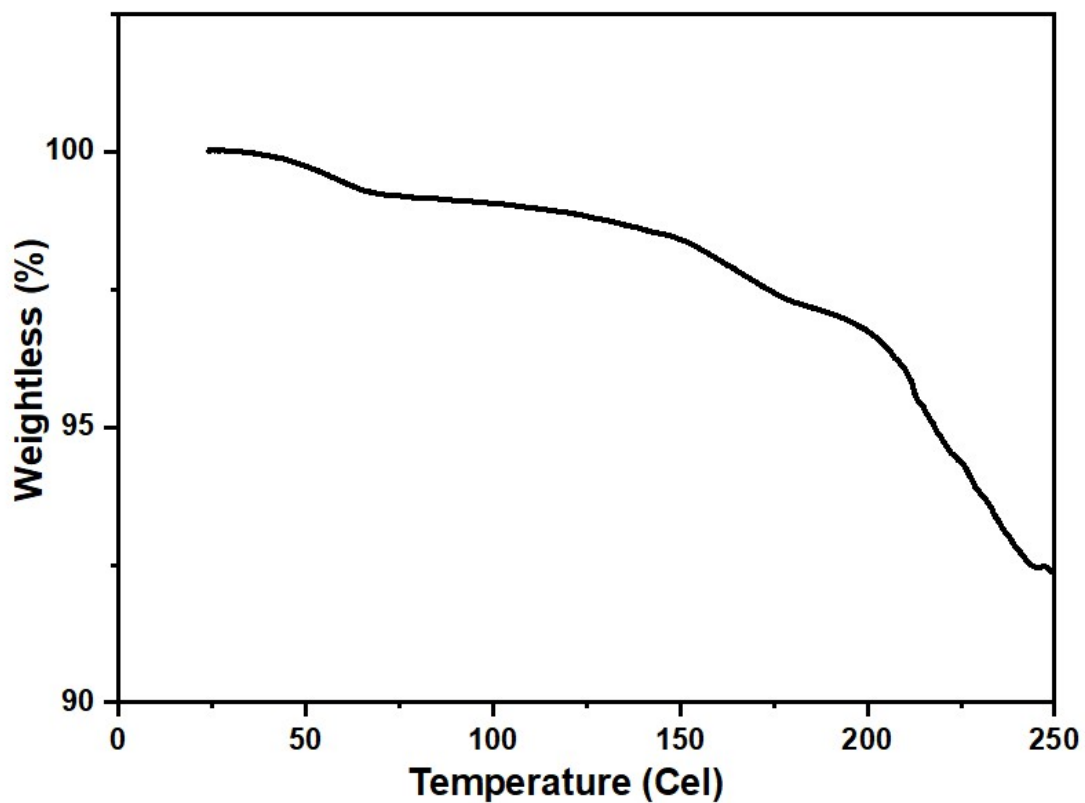

**Figure S1.** Thermogravimetric analysis of [Co(SS-cth)(phendiox)]AsF<sub>6</sub>·0.5EtOH. The measurements were performed using 10.3 mg powder from 20°C to 250°C, temperature at which the sample began to decompose. The TGA result for [Co(SS-cth)(phendiox)]AsF<sub>6</sub>·0.5EtOH shows a loss of co-crystallized EtOH molecule at the temperature range from 60°C to 170°C, which is also confirmed in the single crystal structure.

**Table S1.** Crystallographic data and structure refinement parameters of [Co(SS-cth)(phendiox)]AsF<sub>6</sub>·0.5EtOH.

| Complexes                                                                   | [Co(SS-cth)(phendiox)]AsF <sub>6</sub> ·0.5EtOH                                                               | [Co(SS-cth)(phendiox)]AsF <sub>6</sub> ·0.5EtOH                                                               |
|-----------------------------------------------------------------------------|---------------------------------------------------------------------------------------------------------------|---------------------------------------------------------------------------------------------------------------|
| Formula                                                                     | C <sub>62</sub> H <sub>90</sub> As <sub>2</sub> Co <sub>2</sub> F <sub>12</sub> N <sub>8</sub> O <sub>5</sub> | C <sub>62</sub> H <sub>90</sub> As <sub>2</sub> Co <sub>2</sub> F <sub>12</sub> N <sub>8</sub> O <sub>5</sub> |
| Formula weight                                                              | 1522.139                                                                                                      | 1522.139                                                                                                      |
| <i>T</i> / K                                                                | 78                                                                                                            | 300                                                                                                           |
| Crystal system                                                              | monoclinic                                                                                                    | monoclinic                                                                                                    |
| Space group                                                                 | <i>P</i> 2 <sub>1</sub>                                                                                       | <i>P</i> 2 <sub>1</sub>                                                                                       |
| <i>a</i> / Å                                                                | 9.51352(10)                                                                                                   | 9.57346(16)                                                                                                   |
| <i>b</i> / Å                                                                | 11.92241(11)                                                                                                  | 12.02833(19)                                                                                                  |
| <i>c</i> / Å                                                                | 30.3350(3)                                                                                                    | 30.3122(4)                                                                                                    |
| <i>α</i> / °                                                                | 90                                                                                                            | 90                                                                                                            |
| <i>β</i> / °                                                                | 93.7791(9)                                                                                                    | 92.7992(14)                                                                                                   |
| <i>γ</i> / °                                                                | 90                                                                                                            | 90                                                                                                            |
| <i>V</i> / Å <sup>3</sup>                                                   | 3433.24(6)                                                                                                    | 3486.37(9)                                                                                                    |
| <i>Z</i>                                                                    | 2                                                                                                             | 2                                                                                                             |
| <i>D<sub>c</sub></i> / g·cm <sup>-3</sup>                                   | 1.470                                                                                                         | 1.450                                                                                                         |
| <i>F</i> (000)                                                              | 1568.0                                                                                                        | 1568.0                                                                                                        |
| GOF on <i>F</i> <sup>2</sup>                                                | 1.050                                                                                                         | 1.049                                                                                                         |
| <i>R</i> <sub>1</sub> , <i>wR</i> <sub>2</sub> [ <i>I</i> > 2σ( <i>I</i> )] | <i>R</i> <sub>1</sub> = 0.0898, <i>wR</i> <sub>2</sub> = 0.1873                                               | <i>R</i> <sub>1</sub> = 0.0817, <i>wR</i> <sub>2</sub> = 0.1776                                               |
| <i>R</i> <sub>1</sub> , <i>wR</i> <sub>2</sub> (all data)                   | <i>R</i> <sub>1</sub> = 0.1218, <i>wR</i> <sub>2</sub> = 0.2017                                               | <i>R</i> <sub>1</sub> = 0.1652, <i>wR</i> <sub>2</sub> = 0.2105                                               |
| Friedel coverage                                                            | 0.822                                                                                                         | 0.811                                                                                                         |
| Flack parameter                                                             | 0.07(2)                                                                                                       | 0.01(2)                                                                                                       |

**Table S2.** Co-O bond lengths of [Co(SS-cth)(phendiox)]AsF<sub>6</sub>·0.5EtOH at 300 K and 78 K

| Temperature | <i>α</i> (Å) | <i>β</i> (Å) |
|-------------|--------------|--------------|
| 300 K       | 2.050, 2.064 | 2.084, 2.092 |
| 78 K        | 1.907, 1.898 | 1.999, 2.017 |

**Table S3.** Stretched exponential fitting parameters (*τ*, *β*, *γ*) of the fitting curve at different temperatures.

| Temperature (K) | <i>τ</i> (s) | <i>β</i> | <i>γ</i> |
|-----------------|--------------|----------|----------|
| 5               | 4015.52      | 0.67     | 0.64     |
| 15              | 1429.29      | 0.56     | 0.64     |
| 20              | 1197.66      | 0.91     | 0.72     |

## Reference

1. A. M. Tait, D. H. Busch and N. F. Curtis, in *Inorganic Syntheses*, 1978, DOI: <https://doi.org/10.1002/9780470132494.ch2>, pp. 10-17.
2. O. V. Dolomanov, L. J. Bourhis, R. J. Gildea, J. A. Howard and H. Puschmann, *Journal of applied crystallography*, 2009, **42**, 339-341.
